# Supplementary material for: Reliable detection of o-nitrophenol and p-nitrophenol based on carbon nanotubes covalently functionalized with ferrocene as an inner reference
Source: Royal Society of Chemistry journal article supplement (doi:10.1039/c9nj02276g), 2019-01-01
Supplement: c9nj02276g1.pdf [file c9nj02276g1.pdf]

## Supplemental Material

### Reliable detection of *o*-nitrophenol and *p*-nitrophenol based on carbon nanotubes covalently functionalized with ferrocene as an inner reference

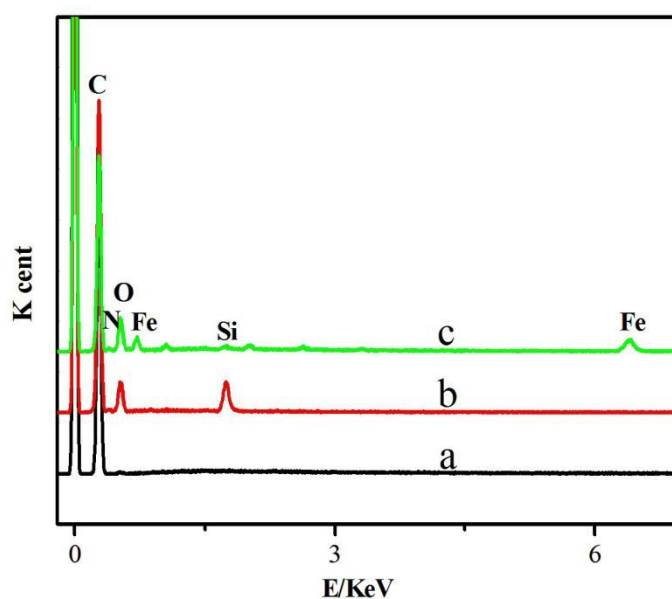

Fig. S1 EDS of MWNTs (a), APTES modified MWNTs (b), and Fc-MWNTs (c)

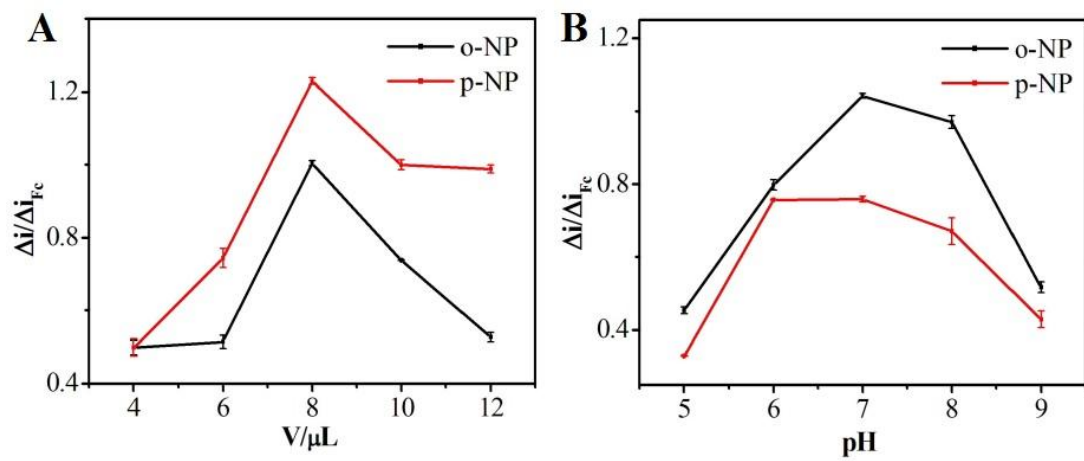

**Fig. S2** (A) Effect of the amount of Fc-MWNTs, (B) Effect of pH value of the detection solution.

**Table S1** Comparison the analytical performances of different electrochemical sensors for o-NP and p-NP detection.

| Electrochemical sensors                     | Linear range ( $\mu\text{mol/L}$ ) |          | LOD ( $\mu\text{mol/L}$ ) |       | References |
|---------------------------------------------|------------------------------------|----------|---------------------------|-------|------------|
|                                             | o-NP                               | p-NP     | o-NP                      | p-NP  |            |
| nano-Au/GCE                                 | 10–1000                            | 10–1000  | 8                         | 8     | 1          |
| meso-ZnCo <sub>2</sub> O <sub>4</sub> / GCE | 1–4000                             | 1–4000   | 0.3                       | 0.3   | 2          |
| CD-RGO/GCE                                  | 7.2–64.7                           | 7.2–72.0 | 0.14                      | 0.36  | 3          |
| OMCs/GCE                                    | 0.5–90                             | 2–90     | 0.08                      | 0.1   | 4          |
| MWNTs/GCE                                   | 4–2000                             | 2–4000   | 0.5                       | 0.4   | 5          |
| Dual -CD-SiC/GCE                            | 0.01–150                           | 0.01–150 | 0.019                     | 0.023 | 6          |
| CD-SBA/CPE DPV                              | 0.2-1.4                            | 0.2-1.4  | 0.01                      | 0.01  | 7          |
| Polyfurfural film/GCE                       | 5-100                              | 0.75-100 | 0.3                       | 0.04  | 8          |
| FMC-AMWCNTs/GCE                             | 0.1-100                            | 0.1-100  | 0.069                     | 0.073 | This work  |

## References

1. L. Chu, L. Han and X. L. Zhang, *J. Appl. Electrochem.*, 2011, **41**, 687-694.
2. J. J. Zhang, S. Q. Cui, Y. P. Ding, X. X. Yang, K. Guo and J. T. Zhao, *Biosens. Bioelectron.*, 2018, **112**, 177-185.
3. Z. N. Liu, X. M. Ma, H. C. Zhang, W. J. Lu, H. Y. Ma and S. F. Hou, *Electroanal.*, 2012, **24**, 1178-1185.
4. T. T. Zhang, Q. L. Lang, D. P. Yang, L. Li, L. X. Zeng, C. Zheng, T. Li, M. D. Wei and A. H. Liu, *Electrochim. Acta*, 2013, **106**, 127-134.
5. L. Q. Luo, X. L. Zou, Y. P. Ding and Q. S. Wu, *Sens. Actuators, B*, 2008, **135**, 61-65.
6. S. L. Wu, S. M. Fan, S. Tan, J. Q. Wang and C. P. Li, *RSC Adv.*, 2018, **8**, 775-784.
7. X. M. Xu, Z. Liu, X. Zhang, S. Duan, S. Xu and C. L. Zhou, *Electrochim. Acta*, 2011, **58**, 142-149.
8. T. Y. Wei, X. J. Huang, Q. Zeng and L. S. Wang, *J. Electroanal. Chem.*, 2015, **743**, 105-111.

**Table S2** Results for the determination of o-NP and p-NP in real water samples by Fc-MWNTs/GCE.

| Samples                | Added ( $\mu\text{M}$ ) | Detected content <sup>a</sup> ( $\mu\text{M}$ ) | Recovery (%) | RSD (%) |
|------------------------|-------------------------|-------------------------------------------------|--------------|---------|
| Changjiang River water | -                       | -                                               | -            | -       |
|                        | 0.1                     | 0.10                                            | 102.4        | 4.3     |
|                        | 1.0                     | 1.01                                            | 101.0        | 5.0     |
|                        | 10.0                    | 9.75                                            | 97.5         | 4.9     |
|                        | 50.0                    | 51.4                                            | 102.7        | 0.6     |
|                        | 100.0                   | 94.3                                            | 94.3         | 1.5     |
|                        | -                       | -                                               | -            | -       |
|                        | 0.1                     | 0.10                                            | 103.4        | 5.6     |
|                        | 1.0                     | 1.04                                            | 104.4        | 4.8     |
|                        | 10.0                    | 9.86                                            | 98.6         | 4.7     |
| Jinghu Lake water      | 50.0                    | 53.1                                            | 106.2        | 2.2     |
|                        | 100.0                   | 9.63                                            | 96.3         | 2.9     |
|                        | -                       | -                                               | -            | -       |
|                        | 0.1                     | 0.10                                            | 102.1        | 5.5     |
|                        | 1.0                     | 1.04                                            | 104.0        | 5.7     |
|                        | 10.0                    | 9.37                                            | 93.7         | 4.1     |
|                        | 50.0                    | 51.4                                            | 102.8        | 0.6     |
|                        | 100.0                   | 94.8                                            | 94.8         | 1.1     |
|                        | -                       | -                                               | -            | -       |
|                        | 0.1                     | 0.10                                            | 100.0        | 3.1     |
| Huajin River water     | 1.0                     | 1.06                                            | 106.0        | 2.2     |
|                        | 10.0                    | 10.2                                            | 100.2        | 5.1     |
|                        | 50.0                    | 52.4                                            | 104.9        | 0.8     |
|                        | 100.0                   | 94.7                                            | 94.7         | 0.6     |
|                        | -                       | -                                               | -            | -       |
|                        | 0.1                     | 0.10                                            | 103.1        | 4.7     |
|                        | 1.0                     | 1.00                                            | 100.4        | 4.0     |
|                        | 10.0                    | 10.2                                            | 101.9        | 4.1     |
|                        | 50.0                    | 50.6                                            | 101.2        | 4.5     |
|                        | 100.0                   | 94.5                                            | 94.5         | 1.5     |
| -                      | -                       | -                                               | -            |         |
| 0.1                    | 0.10                    | 103.4                                           | 5.4          |         |
| 1.0                    | 1.02                    | 102.1                                           | 3.9          |         |
| 10.0                   | 10.5                    | 104.8                                           | 2.4          |         |
| 50.0                   | 53.3                    | 106.6                                           | 1.8          |         |
| 100.0                  | 100.5                   | 100.6                                           | 5.8          |         |

<sup>a</sup>Average value of three determinations.
